# Supplementary material
Source: PubMed Central journal article supplement (PMC10118071)
Supplement: NIHMS1888022-supplement-Supp_Tables_and_Figs.pdf [file NIHMS1888022-supplement-Supp_Tables_and_Figs.pdf]

## Supplementary Tables and Figures

### *Conservation Genetics*

## Transcriptome annotation reveals minimal immunogenetic diversity among Wyoming toads, *Anaxyrus baxteri*

Kara B. Carlson<sup>1</sup>, Dustin J. Weisel<sup>1</sup>, Hayley D. Ackerman<sup>1</sup>, Jessica Romanet<sup>1</sup>, Emily F. Christiansen<sup>2</sup>, Jennifer N. Niemuth<sup>2</sup>, Christina Williams<sup>1</sup>, Matthew Breen<sup>1,3,4</sup>, Michael K. Stoskopf<sup>2,5</sup>, Alex Dornburg<sup>6\*</sup>, and Jeffrey A. Yoder<sup>1,3,4\*</sup>

1. Department of Molecular Biomedical Sciences, North Carolina State University, Raleigh, NC, USA
2. Environmental Medicine Consortium, North Carolina State University, Raleigh, NC, USA
3. Comparative Medicine Institute, North Carolina State University, Raleigh, NC, USA
4. Center for Human Health and the Environment, North Carolina State University, Raleigh, NC, USA
5. Department of Clinical Sciences, North Carolina State University, Raleigh, NC, USA
6. Department of Bioinformatics and Genomics, University of North Carolina at Charlotte, Charlotte, NC USA

\* Corresponding authors at:

Alex Dornburg, E-mail address: [adornbur@uncc.edu](mailto:adornbur@uncc.edu). Phone: +1 704-687-8437

Jeffrey A. Yoder, E-mail address: [jeff\\_yoder@ncsu.edu](mailto:jeff_yoder@ncsu.edu). Phone: +1 919-515-7406

### Contents:

|                                                                                                           |    |
|-----------------------------------------------------------------------------------------------------------|----|
| <b>Supplementary Table S1.</b> Summary of Wyoming toad transcriptome analysis .....                       | 2  |
| <b>Supplementary Fig. S1.</b> BUSCO assessment results from Wyoming toad transcriptomes. ....             | 2  |
| <b>Supplementary Table S2.</b> Duplicated sequences in all three Wyoming toads.....                       | 3  |
| <b>Supplementary Fig. S2.</b> Summary of annotated transcriptomes based on GO terms .....                 | 4  |
| <b>Supplementary Table S3.</b> Representative Wyoming toad TLR transcripts and GenBank IDs.....           | 5  |
| <b>Supplementary Table S4.</b> Representative Wyoming toad MHC class I transcripts and GenBank IDs .....  | 5  |
| <b>Supplementary Fig. S3.</b> Wyoming toad MHC class I UA sequences. ....                                 | 6  |
| <b>Supplementary Fig. S4.</b> Wyoming toad MHC class I UB sequences. ....                                 | 6  |
| <b>Supplementary Fig. S5.</b> Wyoming toad MHC class I UC sequences. ....                                 | 7  |
| <b>Supplementary Fig. S6.</b> Wyoming toad MHC class I UD sequences. ....                                 | 7  |
| <b>Supplementary Table S5.</b> Representative Wyoming toad MHC class II transcripts and GenBank IDs ..... | 8  |
| <b>Supplementary Fig. S7.</b> Wyoming toad MHC class II alpha chain sequences. ....                       | 9  |
| <b>Supplementary Fig. S8.</b> Wyoming toad MHC class II beta chain sequences. ....                        | 9  |
| <b>Supplementary Table S6.</b> Sequence identity between bufonid TLR ectodomains .....                    | 10 |
| <b>Supplementary Table S7.</b> Sequence identity between bufonid TLR TIR domains .....                    | 10 |

**Supplementary Table S1. Summary of Wyoming toad transcriptome analysis**

|                                 | Toad 6691   | Toad 7039   | Toad 7092   |
|---------------------------------|-------------|-------------|-------------|
| Total Trinity Genes             | 245,790     | 134,581     | 143,205     |
| Total Trinity Transcripts       | 332,088     | 199,248     | 209,600     |
| Percent GC                      | 45.07       | 45.31       | 45.41       |
| Contig N50 (ALL)                | 1,709       | 2,041       | 2,038       |
| Median Contig Length (ALL)      | 371         | 426         | 425         |
| Avg Contig (ALL)                | 820.4       | 969.95      | 961.91      |
| Total Assembled Bases (ALL)     | 272,445,109 | 193,259,855 | 201,616,519 |
| Contig N50 (LONGEST)            | 709         | 1,096       | 1,044       |
| Median Contig Length (LONGEST)  | 319         | 337         | 337         |
| Avg Contig (LONGEST)            | 555.6       | 660.94      | 652.23      |
| Total Assembled Bases (LONGEST) | 136,560,916 | 88,949,732  | 93,402,820  |
| Total Paired Reads              | 79,216,573  | 61,479,313  | 65,858,371  |
| Overall Alignment Rate          | 91.63%      | 90.71%      | 91.31%      |

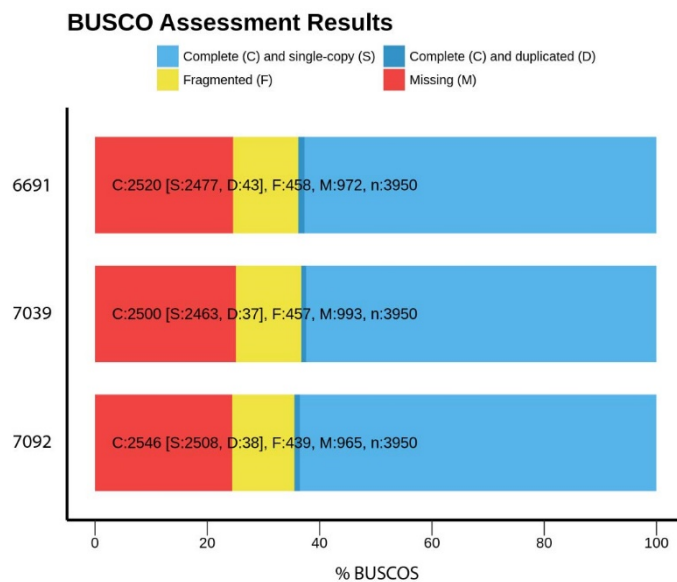**Supplementary Fig. S1. BUSCO assessment results from Wyoming toad transcriptomes.**

BUSCO tetrapod orthologs were cataloged as complete and single copy, complete and duplicated, fragmented or missing in each of the three toads (6691, 7039 and 7092).

**Supplementary Table S2. Duplicated sequences in all three Wyoming toads\***

| BUSCO ID    | OrthoDB Annotation                | Human Uniprot ID |
|-------------|-----------------------------------|------------------|
| EOG090701VI | thyroid peroxidase                | P07202           |
| EOG0907020N | DEAH box polypeptide              | Q8IX18           |
| EOG090702QL | HBS1-like translational GTPase    | D9YZV0           |
| EOG0907036F | peroxisomal biogenesis factor 6   | A0A024RD09       |
| EOG090703A7 | transketolase                     | P29401           |
| EOG090704A2 | flavin containing monooxygenase 4 | P31512           |
| EOG090705SC | cholinergic receptor              | P02708           |
| EOG090705ZM | tubby like protein 3              | O75386           |
| EOG090706G4 | dopamine receptor                 | P14416           |
| EOG090706LB | serine/threonine kinase           | O94768           |
| EOG0907071S | Nucleobindin 2                    | V9HW75           |
| EOG090708E2 | Nephrosis 2                       | Q9NP85           |
| EOG090708FT | NIPA-like domain containing 4     | Q0D2K0           |
| EOG090709BR | potassium channel                 | Q96T55           |
| EOG09070A0P | Coiled-coil domain containing 3   | Q9BQI4           |

\* BUSCO analysis, which identifies ultra-conserved, single copy genes, revealed fifteen duplicate genes in all three Wyoming toads. These genes have been annotated via OrthoDB, however further enrichment analysis is impossible with such a small set of genes.

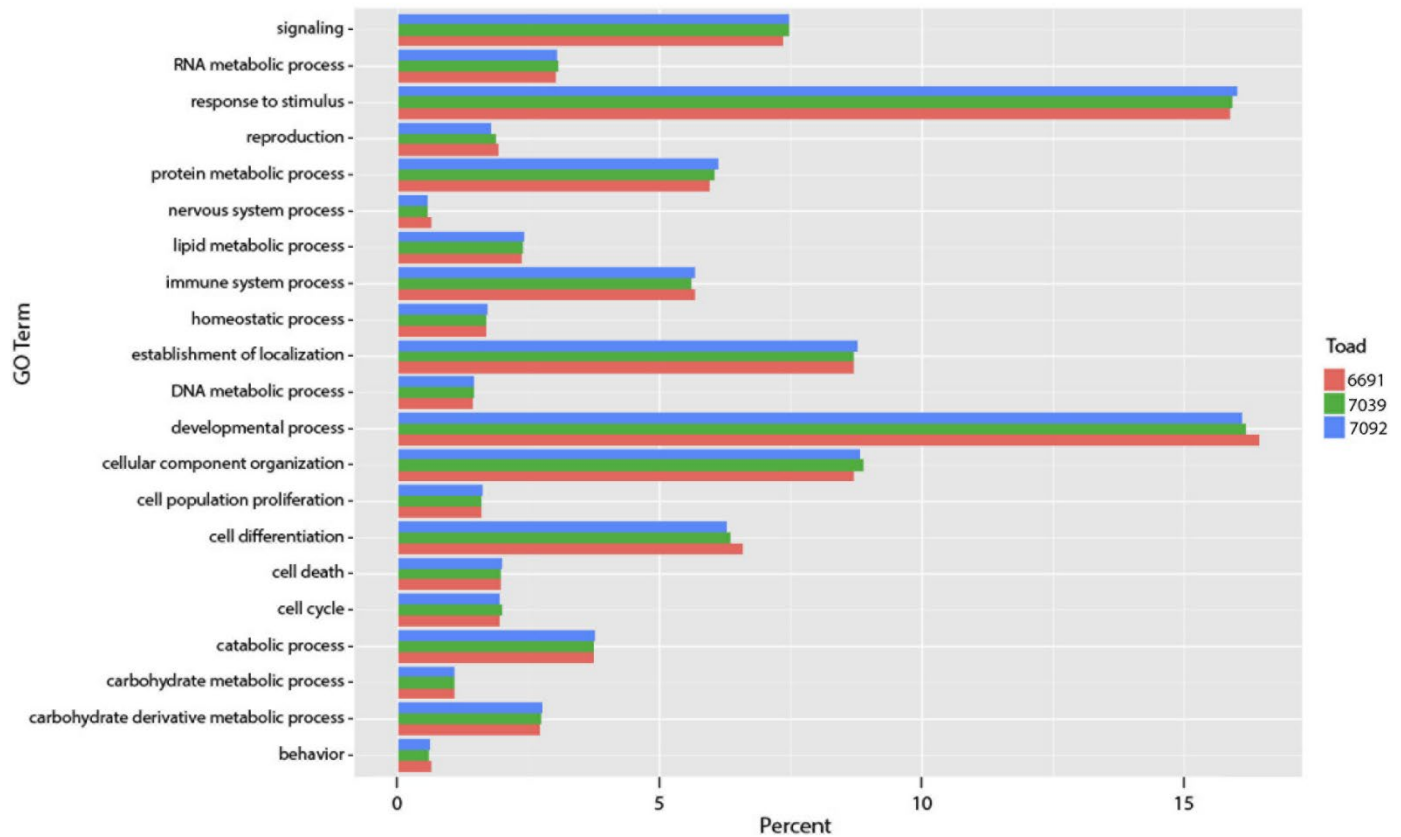

### Supplementary Fig. S2. Summary of annotated transcriptomes based on GO terms

Gene ontology (GO) terms from Wyoming toad annotated transcriptomes and each group's percent contribution to total transcriptome. Biological process GO terms were chosen for this analysis as this category includes the terms immune system processes and response to stimulus which include important immune gene annotations. All three toads displayed comparable proportions of GO terms to one another..

**Supplementary Table S3. Representative Wyoming toad TLR transcripts and GenBank IDs**

| Sequence name | Toad 6691                      | Toad 7039                      | Toad 7092                      |
|---------------|--------------------------------|--------------------------------|--------------------------------|
| TLR1a         | <a href="#">GGUS01160622.1</a> | <a href="#">GGUR01153850.1</a> | <a href="#">GGUQ01094842.1</a> |
| TLR1b         | <a href="#">GGUS01148135.1</a> | <a href="#">GGUR01053790.1</a> | <a href="#">GGUQ01193029.1</a> |
| TLR2          | <a href="#">GGUS01236735.1</a> | Not identified                 | <a href="#">GGUQ01144158.1</a> |
| TLR3          | <a href="#">GGUS01239741.1</a> | <a href="#">GGUR01125592.1</a> | <a href="#">GGUQ01122259.1</a> |
| TLR4          | <a href="#">GGUS01036104.1</a> | <a href="#">GGUR01092862.1</a> | <a href="#">GGUQ01142735.1</a> |
| TLR5          | <a href="#">GGUS01267723.1</a> | <a href="#">GGUR01011083.1</a> | <a href="#">GGUQ01091435.1</a> |
| TLR8a         | <a href="#">GGUS01251716.1</a> | Not identified                 | <a href="#">GGUQ01056653.1</a> |
| TLR8b         | Not identified                 | <a href="#">GGUR01052356.1</a> | Not identified                 |
| TLR12         | <a href="#">GGUS01208850.1</a> | <a href="#">GGUR01100539.1</a> | <a href="#">GGUQ01123333.1</a> |
| TLR13         | <a href="#">GGUS01005708.1</a> | <a href="#">GGUR01162624.1</a> | <a href="#">GGUQ01081784.1</a> |
| TLR14         | <a href="#">GGUS01235967.1</a> | <a href="#">GGUR01048765.1</a> | <a href="#">GGUQ01096496.1</a> |
| TLR21         | <a href="#">GGUS01313948.1</a> | Not identified                 | <a href="#">GGUQ01185422.1</a> |

**Supplementary Table S4. Representative Wyoming toad MHC class I transcripts and GenBank IDs**

| Sequence name            | Toad 6691                      | Toad 7039                      | Toad 7092                      |
|--------------------------|--------------------------------|--------------------------------|--------------------------------|
| <i>Anabax-UA*01</i>      | Not identified                 | <a href="#">GGUR01113130.1</a> | Not identified                 |
| <i>Anabax-UA*02</i>      | <a href="#">GGUS01278791.1</a> | Not identified                 | <a href="#">GGUQ01004097.1</a> |
| <i>Anabax-UB*01</i>      | Not identified                 | <a href="#">GGUR01024835.1</a> | <a href="#">GGUQ01038068.1</a> |
| <i>Anabax-UB*02</i>      | <a href="#">GGUS01018260.1</a> | Not identified                 | Not identified                 |
| <i>Anabax-UC*01</i>      | <a href="#">GGUS01183637.1</a> | Not identified                 | <a href="#">GGUQ01038171.1</a> |
| <i>Anabax-UC*02</i>      | Not identified                 | <a href="#">GGUR01080688.1</a> | <a href="#">GGUQ01038022.1</a> |
| <i>Anabax-UD*01</i>      | <a href="#">GGUS01214789.1</a> | <a href="#">GGUR01025091.1</a> | Not identified                 |
| <i>Anabax-UD*02</i>      | Not identified                 | Not identified                 | <a href="#">GGUQ01038222.1</a> |
| <i>Anabax-UD*03</i>      | <a href="#">GGUS01191828.1</a> | Not identified                 | Not identified                 |
| <i>β-2-microglobulin</i> | <a href="#">GGUS01148031.1</a> | <a href="#">GGUR01189603.1</a> | <a href="#">GGUQ01034849.1</a> |

|                     |     | SP                                                            |
|---------------------|-----|---------------------------------------------------------------|
| <i>Anabax-UA*01</i> | 1   | MFPLIFLLLYVSAVYSDTHSLRYYMTGVSAPGSGLPEYSEVGYVDDREIVNYNSESGRME  |
| <i>Anabax-UA*02</i> | 1   | MFPLIFLLLYVSAVYSDTHSLRYYMTGVSAPGSGLPEYSEVGYVDDREIVNYNSESGRME  |
|                     |     |                                                               |
| <i>Anabax-UA*01</i> | 61  | PKVKWMEKVDPGYWERNQIAKGNEAVNKHNVRTLMSRFNQGGFHIVQAMYGCERRDDG    |
| <i>Anabax-UA*02</i> | 61  | PKVKWMEKVDPGYWERNQIAKGNEAVNKHNVRTLMSRFNQGGFHIVQWMYGCERIDG     |
|                     |     |                                                               |
| <i>Anabax-UA*01</i> | 121 | GITVYDQHGVDGGEFMSLDTQTWTFIPTMSQAQITAQRWNSPEEQWGQRYKNYLEIECKD  |
| <i>Anabax-UA*02</i> | 121 | GITGYDQHGVDGGEFMSLDTQTWTYIPTMSQAQITAQRWNSPEEQWGQRYKNYLEIECKD  |
|                     |     |                                                               |
| <i>Anabax-UA*01</i> | 181 | WLQKYVENGREDLERRVQPOVKVSGQKDDAMMLHCQVYGFHPRPVHVKWMKKNKDDVHSY  |
| <i>Anabax-UA*02</i> | 181 | WLQKYVENGREDLERRVQPOVKVSGQKDDAMMLHCQVYGFHPRPVHVKWMKKNKDDVHSY  |
|                     |     |                                                               |
|                     |     | TM                                                            |
| <i>Anabax-UA*01</i> | 241 | ETHTHTLPNPDGTYQIRVSAEVI PKEGESYSCYVDHSSLKEPLNIVWEPNRTVWVTPVVI |
| <i>Anabax-UA*02</i> | 241 | ETHTHTLPNPDGTYQIRVSAEVI PKEGESYSCYVDHSSLKEPLNIVWEPNRTVWVTPVVI |
|                     |     |                                                               |
|                     |     | TM                                                            |
| <i>Anabax-UA*01</i> | 301 | AVVVILLAVLGIGGFLLYRRKKPDYKATSTSDTSSSDASDAAKA*                 |
| <i>Anabax-UA*02</i> | 301 | AVVVILLAVLGIGGFLLYRRKKPDYKATSTSDTSSSDASDAAKA*                 |

### Supplementary Fig. S3. Wyoming toad MHC class I UA sequences.

The two major forms of *Anabax-UA* were aligned.  $\alpha 1$ ,  $\alpha 2$ , and  $\alpha 3$  domains are color-coded blue, red and yellow, respectively. Signal peptide (SP) and transmembrane (TM) domains are indicated above the alignment. Identical residues are shaded the same color, except for gray which reflects structurally similar residues. An asterisk indicates the presence of a stop codon.

|                     |     | SP                                                             |
|---------------------|-----|----------------------------------------------------------------|
| <i>Anabax-UB*01</i> | 1   | MEMYALTLILLCTSGAYS DSHSLYYCYTGV TAPGSGLPEFSIVGYMDDQQTELYNSDIGK |
| <i>Anabax-UB*02</i> | 1   | -----SHSLRYYYTGV SAPGSGLPEFSIVGYMDDQQTELYNSDIGK                |
|                     |     |                                                                |
| <i>Anabax-UB*01</i> | 61  | CIPVATWVRKERPEQWLKKTLT SKANEALFKHEVKIVMKRFNHTEGLHFAQVMHSCELKD  |
| <i>Anabax-UB*02</i> | 42  | CIPVATWVRKERPEQWLKKTLT SKANEALFKHEVKIVMKRFNHTEGLHFAQVMHSCELKD  |
|                     |     |                                                                |
| <i>Anabax-UB*01</i> | 121 | DGSIVSYEEFRYDGREYMYLDIKTGLFIPTMAEAQIT TQRWNSPDVRAGQIRIRNYLANEC |
| <i>Anabax-UB*02</i> | 102 | DGSIVSYEEFRYDGREYMYLDIKTGLFIPTMAEAQIT TQRWNSPDVRAGQIRIRNYLANEC |
|                     |     |                                                                |
| <i>Anabax-UB*01</i> | 181 | IDRLRRYVVY GREDLERRVQPGVKVTG RESGEITKLHCLVYGFHPRAVDVKWMKNGIDEI |
| <i>Anabax-UB*02</i> | 162 | IDRLRRYVVY GREDLERRVQPGVKVTG RESGEITKLHCLVYGFHPRAVDVKWMKNGIDEI |
|                     |     |                                                                |
| <i>Anabax-UB*01</i> | 241 | PSYETTHVLPNPDGTYQIRVSVEVIPKEGESYSCY                            |
| <i>Anabax-UB*02</i> | 222 | PSYETTHVLPNPDGTYQIRVSVEVIPKEGESYS--                            |

### Supplementary Fig. S4. Wyoming toad MHC class I UB sequences.

The two major forms of *Anabax-UB* were aligned.  $\alpha 1$ ,  $\alpha 2$ , and  $\alpha 3$  domains are color-coded blue, red and yellow, respectively. Signal peptide (SP) domains are indicated above the alignment. Identical residues are shaded the same color, except for gray which reflects structurally similar residues. Neither of these transcripts encode a stop codon and are likely 3' truncated.

|                     |     | SP                                       |                        |
|---------------------|-----|------------------------------------------|------------------------|
| <i>Anabax-UC*01</i> | 1   | MMEKMC                                   | SLALVLLSLSGAYS         |
| <i>Anabax-UC*02</i> | 1   | MMEKMC                                   | SLALVLLSLSGAYS         |
| <i>Anabax-UC*01</i> | 61  | GRSVPVAPWLSRNVGLEHWERRTRISKEYEALFKHEVKA  | AAVKRFNHTGGFHFVQVMHNCE |
| <i>Anabax-UC*02</i> | 61  | GRSVPVAPWLSRNVGLEHWERRTRISKEYEALFKHEVKA  | AAVKRFNHTGGFHFVQVMHNCE |
| <i>Anabax-UC*01</i> | 121 | MRDDGSTTGHQEYRYDGEEYMYLDIKSALFNPTMAEAQII | TQRWNSPDIRKGEREKNYLE   |
| <i>Anabax-UC*02</i> | 121 | MRDDGSTTGHQEYRYDGEEYMYLDIKSALFNPTMAEAQII | TQRWNSPDIRKGEREKNYLE   |
| <i>Anabax-UC*01</i> | 181 | SKCIERLKKYLEFGREDLERRGDFGLSHVYNFATVPH*   |                        |
| <i>Anabax-UC*02</i> | 181 | SKCIERLKKYLEFGREDLERRVQPGVKVTG-----      |                        |

### Supplementary Fig. S5. Wyoming toad MHC class I UC sequences.

The two major forms of *Anabax-UC* were aligned.  $\alpha 1$ , and  $\alpha 2$  domains are color-coded blue and red, respectively. Signal peptide (SP) domains are indicated above the alignment. Identical residues are shaded the same color, except for gray which reflects structurally similar residues. An asterisk indicates the presence of a stop codon.

|                     |     | SP                                                           |              |
|---------------------|-----|--------------------------------------------------------------|--------------|
| <i>Anabax-UD*01</i> | 1   | MEMYALTLILLCTSGAYS                                           | DSHSLYYCYTGV |
| <i>Anabax-UD*02</i> | 1   | MEMYALTLILLCTSGAYS                                           | DSHSLYYCYTGV |
| <i>Anabax-UD*03</i> | 1   | MEMYALTLILLCTSGAYS                                           | DSHSLYYCYTGV |
| <i>Anabax-UD*01</i> | 61  | SVPVAHWLKEKEDSKFWDELTRIRQYSETFFRNELKIAVKRFNHTKGFHYVQAMLGCELR |              |
| <i>Anabax-UD*02</i> | 61  | SVPVAHWLKEKEDSKFWDELTRIRQYSETFFRNELKIAVKRFNHTKGFHYVQAMLGCELR |              |
| <i>Anabax-UD*03</i> | 61  | SVPVAHWLKEKEDSKFWDELTRIRQYSETFFRNELKIAVKRFNHTKGFHYVQAMLGCELR |              |
| <i>Anabax-UD*01</i> | 121 | DDGSTIGFNQYANDGSEFLFLDLQTKTFIPTMAEAQII                       | TQKWN        |
| <i>Anabax-UD*02</i> | 121 | DDGSTIGFNQYANDGSEFLFLDLQTKTFIPTMAEAQII                       | TQKWN        |
| <i>Anabax-UD*03</i> | 121 | DDGSTIGFNQYANDGSEFLFLDLQTKTFIPTMAEAQII                       | TQKWN        |
| <i>Anabax-UD*01</i> | 181 | INRLNRYLKHGRQHLERRVQPGVKVTGRESGEVTKLHCHVYGFHPRAVDVKW         | MKNGIDEI     |
| <i>Anabax-UD*02</i> | 181 | INRLNRYLKHGRQHLERRVQPGVKVTGRESGEVTKLHCHVYGFHPRAVDVKW         | MKNE----     |
| <i>Anabax-UD*03</i> | 181 | INRLNRYLKHGRQHLERRGDTAHYLYQVFL-----                          | VIMYSR-ENKYL |
| <i>Anabax-UD*01</i> | 241 | PSYETTHVLPNPDGTYQIRVSVEVIPKEGESYS                            |              |
| <i>Anabax-UD*02</i> |     | -----                                                        |              |
| <i>Anabax-UD*03</i> | 234 | QRMEMSVIFI-----                                              | IGR---       |

### Supplementary Fig. S6. Wyoming toad MHC class I UD sequences.

The three major forms of *Anabax-UC* were aligned.  $\alpha 1$ ,  $\alpha 2$ , and  $\alpha 3$  domains are color-coded blue, red and yellow, respectively. Signal peptide (SP) domains are indicated above the alignment. Identical residues are shaded the same color, except for gray which reflects structurally similar residues. None of these transcripts encode a stop codon and are likely 3' truncated.

**Supplementary Table S5. Representative Wyoming toad MHC class II transcripts and GenBank IDs**

| Sequence name                                              | Toad 6691                      | Toad 7039                      | Toad 7092                      |
|------------------------------------------------------------|--------------------------------|--------------------------------|--------------------------------|
| <i>Anabax-DAA</i>                                          | <a href="#">GGUS01080349.1</a> | <a href="#">GGUR01117947.1</a> | <a href="#">GGUQ01148610.1</a> |
| <i>Anabax-DBA</i>                                          | <a href="#">GGUS01104323.1</a> | <a href="#">GGUR01016231.1</a> | <a href="#">GGUQ01047262.1</a> |
| <i>Anabax-DAB*01</i>                                       | <a href="#">GGUS01279675.1</a> | <a href="#">GGUR01053143.1</a> | <a href="#">GGUQ01049761.1</a> |
| <i>Anabax-DAB*02</i>                                       | Not identified                 | <a href="#">GGUR01053272.1</a> | <a href="#">GGUQ01049863.1</a> |
| <i>Truncated novel class II <math>\beta</math>1 domain</i> | <a href="#">GGUS01258414.1</a> | <a href="#">GGUR01110179.1</a> | <a href="#">GGUQ01029310.1</a> |
| <i>Truncated novel class II <math>\beta</math>1 domain</i> | <a href="#">GGUS01090892.1</a> | <a href="#">GGUR01054024.1</a> | <a href="#">GGUQ01039448.1</a> |



|                    |     |                                                             |
|--------------------|-----|-------------------------------------------------------------|
|                    |     | SP                                                          |
| <i>Anabax</i> -DAA | 1   | MIGRKHMYLALICALCIKVIQTVRV---GNRLIQSEFYQTQLPSAEFAFQFDDDEIFNV |
| <i>Anabax</i> -DBA | 1   | MSPRKLINLGLVCMCIIFYVHTSQAVKVGNIQTQSNFYQTLEPTGEFQFQLDGDEM    |
| <i>Anabax</i> -DAA | 58  | FDNKVVRWRLQOFGEVASFEAVGALQNRVMTQNLQVYIKRSNNTAA-KAVTPIIHV    |
| <i>Anabax</i> -DBA | 61  | LQSKDTRWRLPEFGKISTIDTAGALQNIQVLFKFNLNNEYKRSNYTKAKSVARDDIQ   |
| <i>Anabax</i> -DAA | 117 | EPVVLNEPNKLTFCVKEIFPPVIKMSWLKNNQPVTVGVSDTDYFASDLSYYKFLYL    |
| <i>Anabax</i> -DBA | 121 | MPIVLGEPATLVCLATQFFPPVIKMSWLKNNQPMVTVGVTEETVYYPAPDGSFSK     |
|                    |     | TM                                                          |
| <i>Anabax</i> -DAA | 177 | PAEGDVYTCSVEHAGLPINPTNKFWIPEAPSHISETSENVVCGIIGLAVGIIIGIV    |
| <i>Anabax</i> -DBA | 181 | PQKGEVYTCSVEHNGLSMNPTNKFWIPELQPISETSDNIIICGIGLAVGIIIGIV     |
| <i>Anabax</i> -DAA | 237 | FKGLKNNQNRGH*                                               |
| <i>Anabax</i> -DBA | 241 | CKGKNSNQAGGH*                                               |

### Supplementary Fig. S7. Wyoming toad MHC class II alpha chain sequences.

Wyoming toad DAA and DBA were aligned. Identical residues within the  $\alpha 1$  and  $\alpha 2$  domains are color-coded blue and red, respectively. Signal peptide (SP) and transmembrane (TM) domains are indicated above the alignment. Identical residues are shaded the same color, except for gray which reflects structurally similar residues. An asterisk indicates the presence of a stop codon.

|                       |     |                                                                |
|-----------------------|-----|----------------------------------------------------------------|
|                       |     | SP                                                             |
| <i>Anabax</i> -DAB*01 | 1   | MGMLYCISFIFFILLIRLDFCRLSAAVDYMTESKFECHYLNGTQRVRYLHRVVFYNQEEIV  |
| <i>Anabax</i> -DAB*02 | 1   | MGMLYCISFIFFILLIRLDFCRLSAAVDYMTESKFECHYLNGTQRVRYLHRVVFYNQEEIV  |
| <i>Anabax</i> -DAB*01 | 61  | YFDSNKGYYIPKTEFGKPDADYWNKDKDLIEDRKSSVETFCKHNYGVWKAGAIERKVEPE   |
| <i>Anabax</i> -DAB*02 | 61  | YFDSNKGYYIPKTEFGKPDADYWNKDKDLIEDRKSSVETFCKHNYGVWKAGAIERKVEPE   |
| <i>Anabax</i> -DAB*01 | 121 | IVVALMPNHEEPSTVHHILQCNVFGFYVSEVEVKWYRNGQEETELVTSALFQNGDWIYR    |
| <i>Anabax</i> -DAB*02 | 121 | IVVALMPNHEEPSTVHHILQCNVFGFYVSEVEVKWYRNGQEETELVQSTEPYHNGDWSYQ   |
|                       |     | TM                                                             |
| <i>Anabax</i> -DAB*01 | 181 | ILVMLETEIQKGDFTTCEVHHSSLKAPHRVDWHPQMSSESAKSKRATGIGGIVLGTAEFLIV |
| <i>Anabax</i> -DAB*02 | 181 | ILVMLETEIQKGDFTTCEVHHSSLKAPHRVDWHPQSSDAANKMATGIVGFEVLGVVFEFLIV |
|                       |     | TM                                                             |
| <i>Anabax</i> -DAB*01 | 241 | GLVIYMRGRKGQTPFERVQSDHFPHT*                                    |
| <i>Anabax</i> -DAB*02 | 241 | GLVIYMRARKGQMSFPGQSERFLPQ*                                     |

### Supplementary Fig. S8. Wyoming toad MHC class II beta chain sequences.

Wyoming toad DAB\*01 and DAB\*02 were aligned. Identical residues within the  $\beta 1$  and  $\beta 2$  domains are color-coded blue and red, respectively. Signal peptide (SP) and transmembrane (TM) domains are indicated above the alignment. Identical residues are shaded the same color, except for gray which reflects structurally similar residues. An asterisk indicates the presence of a stop codon.

**Supplementary Table S6. Sequence identity between bufonid TLR ectodomains\***

|            | TLR8a, CMT   | TLR8a, CNT   | TLR8b, WYT | TLR8a, WYT | TLR8b, CMT   | TLR8b, CNT   |
|------------|--------------|--------------|------------|------------|--------------|--------------|
| TLR8a, CMT |              | <b>92.87</b> | 52.26      | 52.26      | 52.73        | 52.26        |
| TLR8a, CNT | <b>92.87</b> |              | 52.24      | 52.24      | 53.44        | 52.34        |
| TLR8b, WYT | 52.26        | 52.24        |            | <b>100</b> | 88.8         | 89.49        |
| TLR8a, WYT | 52.26        | 52.24        | <b>100</b> |            | 88.8         | 89.49        |
| TLR8b, CMT | 52.73        | 53.44        | 88.8       | 88.8       |              | <b>90.21</b> |
| TLR8b, CNT | 52.26        | 52.34        | 89.49      | 89.49      | <b>90.21</b> |              |

\* GenBank sequence identifiers for Wyoming toad (WYT) TLRs are in **Supplemental Table S3** and sequence identifiers for common toad (CMT) and cane toad (CNT) TLRs are included in **Figure 2**.

**Supplementary Table S7. Sequence identity between bufonid TLR TIR domains\***

|            | TLR8a, WYT   | TLR8a, CMT   | TLR8a, CNT   | TLR8b, CNT   | TLR8b, WYT   | TLR8b, CMT   |
|------------|--------------|--------------|--------------|--------------|--------------|--------------|
| TLR8a, WYT |              | <b>96.05</b> | <b>97.37</b> | 87.5         | 88.82        | 88.16        |
| TLR8a, CMT | <b>96.05</b> |              | <b>98.68</b> | 87.5         | 87.5         | 86.84        |
| TLR8a, CNT | <b>97.37</b> | <b>98.68</b> |              | 88.82        | 88.82        | 88.16        |
| TLR8b, CNT | 87.5         | 87.5         | 88.82        |              | <b>97.37</b> | <b>96.71</b> |
| TLR8b, WYT | 88.82        | 87.5         | 88.82        | <b>97.37</b> |              | <b>97.37</b> |
| TLR8b, CMT | 88.16        | 86.84        | 88.16        | <b>96.71</b> | <b>97.37</b> |              |

\* GenBank sequence identifiers for Wyoming toad (WYT) TLRs are in **Supplemental Table S3** and sequence identifiers for common toad (CMT) and cane toad (CNT) TLRs are included in **Figure 2**.
